# Supplementary material for: Novel layered crystalline zinc poly(styrene-phenylvinyl phosphonate)-phosphate synthesized by a simple route in a THF–water medium
Source: Royal Society of Chemistry journal article supplement (doi:10.1039/c0dt01553a), 2011-01-01

## Electronic Supplementary Information (ESI) for Dalton Transactions

**Novel layered crystalline zinc poly (styrene-phenylvinyl phosphonate)  
-phosphate synthesized by a simple route in a THF-water medium**

**Jing Huang, Xiangkai Fu,<sup>\*</sup> Gang Wang, Chao Li, Xiaoyan Hu**

Research Institute of Applied Chemistry School of Chemistry and Chemical Engineering

Southwest University, Chongqing, 400715, China

Tel.: +86 23 68253704; Fax: +86 23 68254000

E-mail: fvk@swu.edu.cn

**Fig. S1 The IR spectra of ZnPSPPP 1-7 in the manuscript**

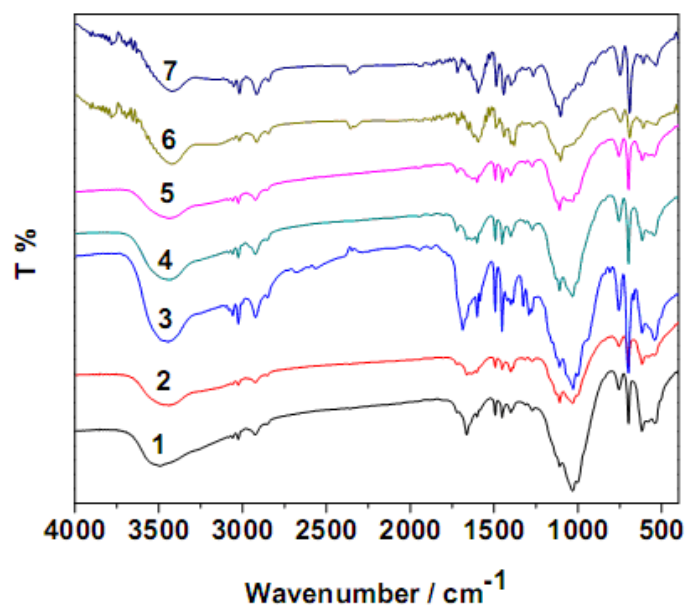

**Fig. S2 XRD of ZnPSPPP 1- 7 and 8 ( $Zn_3(PO_4)_2$ )**

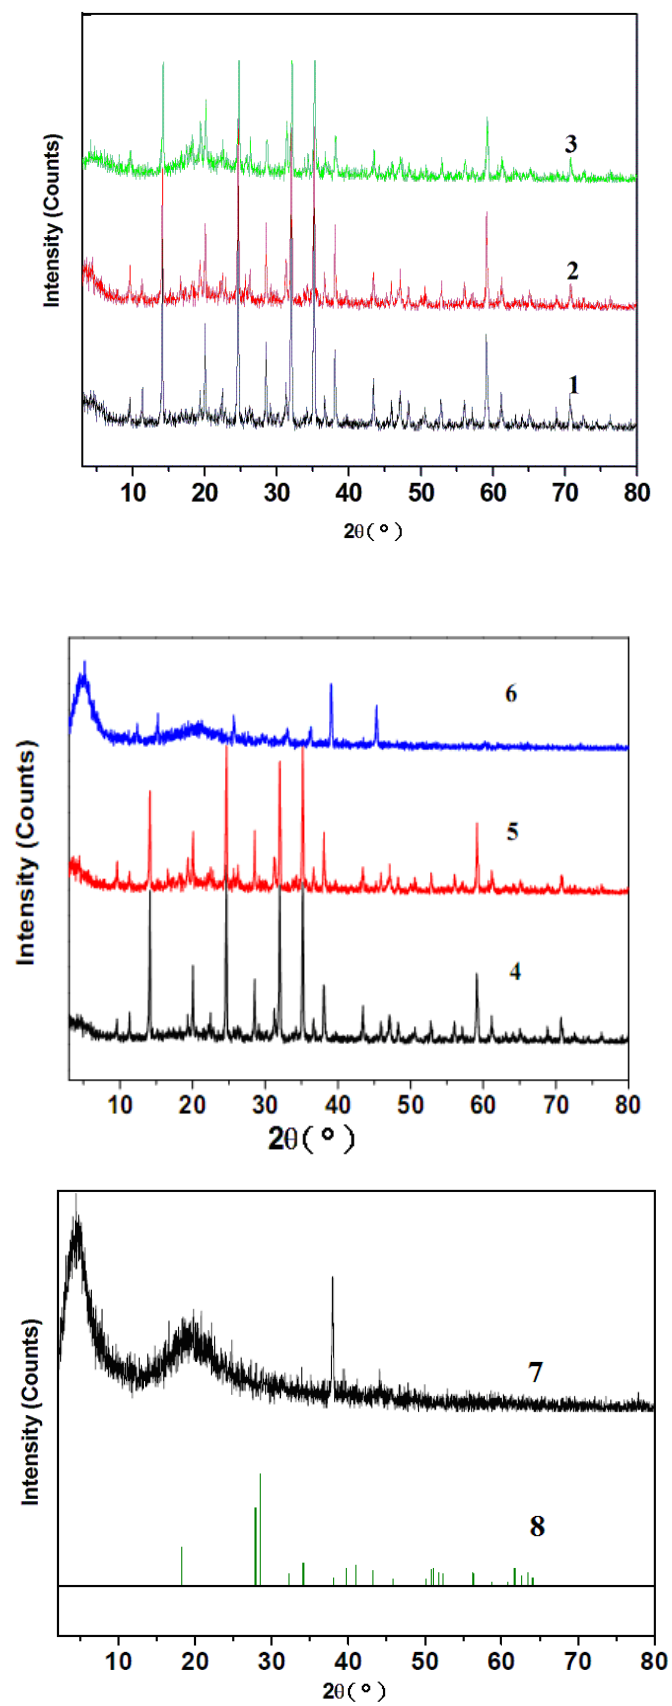

**Fig. S3 Solid reflectance UV-vis spectra of ZnPSPPP 1, 3, 5 and 6.**

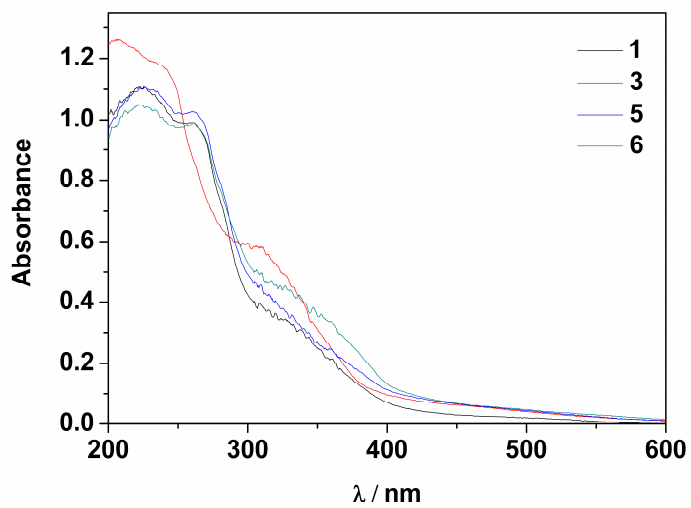

Supplement: c0dt01553a.pdf [file c0dt01553a.pdf]
